# Supplementary material
Source: HighWire-hosted journal article supplement (http://ajnr-stage2.highwire.org/highwire/filestream/67858/field_highwire_adjunct_files/0/19-00226.pdf)
Supplement: 19-00226.pdf [file 19-00226.pdf]

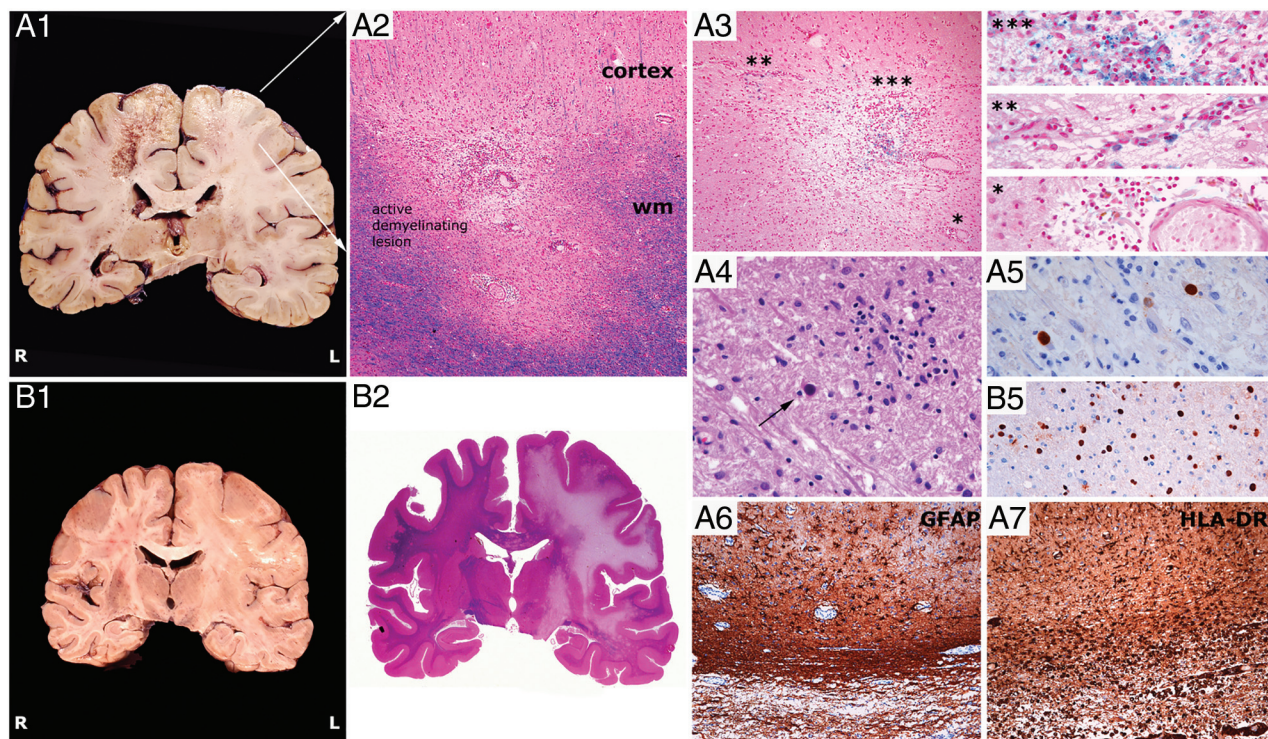

**ON-LINE FIGURE.** Panels A1 to A5 represent patient 1 (with dark SWI-rim), and panels B1, B2, and B5 represent patient 2 (without dark SWI-rim). A1: Hemispheric section reveals large bifrontal and partly cavitated lesions (right frontal). B1: Hemispheric brain section reveals an extensive white matter lesion on the left side with increased volume, blurring of the cortico-subcortical lining, and tissue softening. This is better identified in the Klüver-Barrera stain in B2, where the extensive loss of myelin is readily depicted on the left, while there are multiple additional demyelinating foci in the corpus callosum, the cortico-subcortical boundary, and in the thalamus. A2: Detail of an active cortico-subcortical demyelinating lesion with relatively sharp borders. In the center of the lesion, abundant deposits of iron can be identified in the Prussian blue stain: coarser blue pigment in macrophages (\*\*\*) ; diffuse cytoplasmic stain of pericapillary cells/macrophages in the deep cortical layers (\*\*); and a combination of yellowish and blue perivascular pigment (\*) in areas distant from the active lesion. A4: Enlarged oligodendroglial nuclei with amphophilic material that corresponded to PML cells. The infection by the JC virus is confirmed by immunohistochemistry (A5, B5), which shows more abundant, infected oligodendrocytes in the patient with short-term survival (B5). A6: Immunohistochemistry for glial acidic protein, GFAP, reveals prominent reactive and fibrillary gliosis at the cortico-subcortical boundary, as well as marked microglial activation in the HLA-DR immunostaining (A7).

**On-line Table: Demographic and clinical data of the participants, including information about formation of SWI-hypointense rim**

| Patient No.     | Age (yr) | Sex    | Ground Disease      | Neurological Symptoms            | Current CD4 Count (cells/mL) | Survival Time (mo) | SWI Rim | DWI Rim |
|-----------------|----------|--------|---------------------|----------------------------------|------------------------------|--------------------|---------|---------|
| 1               | 33       | Male   | HIV                 | Hemiplegia, grand mal seizure    | 15                           | 115                | +       | —       |
| 2 <sup>a</sup>  | 47       | Female | HIV                 | Hemiparesis, somnolency, seizure | 184                          | 6                  | +       | —       |
| 3               | 54       | Male   | HIV                 | Expressive aphasia               | 157                          | 110                | +       | —       |
| 4               | 54       | Male   | HIV                 | Homonymous hemianopsia           | 241                          | 109                | +       | —       |
| 5               | 69       | Male   | HIV                 | Psychosis, agitation             | 65                           | 20                 | +       | —       |
| 6               | 48       | Male   | HIV                 | Spastic hemiparesis              | 47                           | 23                 | +       | —       |
| 7               | 41       | Male   | HIV                 | Seizure                          | 51                           | 1.5                | —       | —       |
| 8               | 41       | Male   | HIV                 | Hemiplegia                       | 101                          | 1                  | —       | +       |
| 9               | 42       | Male   | HIV                 | Hemiplegia, dysarthria           | 199                          | 37                 | +       | —       |
| 10              | 34       | Female | HIV                 | Progressive dysarthria           | 51                           | 198                | +       | —       |
| 11              | 26       | Female | MS                  | Hemiplegia                       | N/A                          | 88                 | +       | —       |
| 12              | 40       | Male   | MS                  | Progressive dysarthria           | N/A                          | 68                 | +       | +       |
| 13              | 41       | Male   | MS                  | Hemiplegia                       | N/A                          | 103                | +       | —       |
| 14              | 66       | Male   | AML                 | Coma                             | N/A                          | 2                  | —       | —       |
| 15              | 75       | Male   | MM                  | Hemiplegia                       | N/A                          | 29                 | +       | —       |
| 16 <sup>a</sup> | 63       | Male   | NHL                 | Progressive dysarthria           | N/A                          | 3                  | —       | —       |
| 17              | 54       | Female | Lymphoma Rituximab  | Cognitive decline                | N/A                          | 5                  | +       | —       |
| 18              | 74       | Female | Lymphoma recurrence | Vertigo                          | N/A                          | 2                  | —       | —       |

**Note:**—NHL indicates non-Hodgkin lymphoma; AML, acute myeloid leukemia; MM, multiple myeloma; +, present; —, absent; NA, not available.

<sup>a</sup> Patients with postmortem histologic analysis.
